# Supplementary material for: Wanting to or having to – a qualitative study of experiences and attitudes towards migrant screening for tuberculosis in Norway
Source: Springer Nature journal article supplement (doi:10.1186/s12889-019-7128-z), 2019-06-21
Supplement: MOESM1 [file 16842530]

## **Additional file 1: Population characteristics**

### **Country of origin:**

**Africa (23):** Congo (1), Eritrea (6), Ethiopia (5), Ghana (2), Nigeria (1), Senegal (1), Somalia (5), Tunisia (1), Uganda (1).

**Asia (9):** Burma (1), India (3), Iraq (1), Pakistan (1), Philippines (3).

**Europe (2):** Ukraine, Turkey.

### **Language spoken:**

Burma: Norwegian (1).

Congo: Norwegian (1).

Eritrea: Norwegian (5), English (1).

Ethiopia: Norwegian (2), English (3).

Ghana: English (2).

India: Norwegian (2), English (1).

Iraq: Norwegian (1).

Nigeria: English (1).

Pakistan: Norwegian (1).

Philippines: Norwegian (3).

Senegal: Norwegian (1).

Somalia: Norwegian (3), translator to Norwegian (2).

Tunisia: Norwegian (1).

Turkey: Norwegian (1).

Uganda: Norwegian (1).

Ukraine: Norwegian (1).
