# Supplementary material for: Wanting to or having to – a qualitative study of experiences and attitudes towards migrant screening for tuberculosis in Norway
Source: Springer Nature journal article supplement (doi:10.1186/s12889-019-7128-z), 2019-06-21
Supplement: MOESM2 [file 16842530]

## Additional file 2 - Interview guide (questions and follow-up questions)

- How did you learn about the tuberculosis screening the first time?
- Did you receive an invitation letter? Can you tell us a little about the content of the letter? What do you think about the information in the letter?
- How did you make an appointment? What do you think about having a fixed appointment? What do you think about drop in appointments?
- How was it to find the facility where the examinations were to be taken?
- Can you please tell us a little about what information you were given during the examinations? What do you think about this information?
- How did you experience the examinations?
- Did you receive the results of the examinations? How were the results presented?
- How did you perceive the information you were given about the results of the examinations?
- Could you please tell us a little about what made you attend/not attend the screening?
- Did you have any particular positive or negative experiences related to the examinations? If you had negative experiences, do you have any suggestions on how to do it differently?
- Do you have any suggestions on how to improve the organisation of the screening?
